# Supplementary material for: Indirect and direct electronic transitions and electron transport properties of van der Waals NbOCl2
Source: Royal Society of Chemistry journal article supplement (doi:10.1039/d4cp01897d), 2024-01-01
Supplement: d4cp01897d1.pdf [file d4cp01897d1.pdf]

## Supporting information

### Indirect and direct electronic transitions and electron transport properties of van der Waals NbOCl<sub>2</sub>

Yi Wang, Yuqiang Wu, Mengtao Sun\*

School of Mathematics and Physics, University of Science and Technology  
Beijing, Beijing 100083, China.

\* Corresponding Author. Email: mengtaosun@ustb.edu.cn (M. Sun).

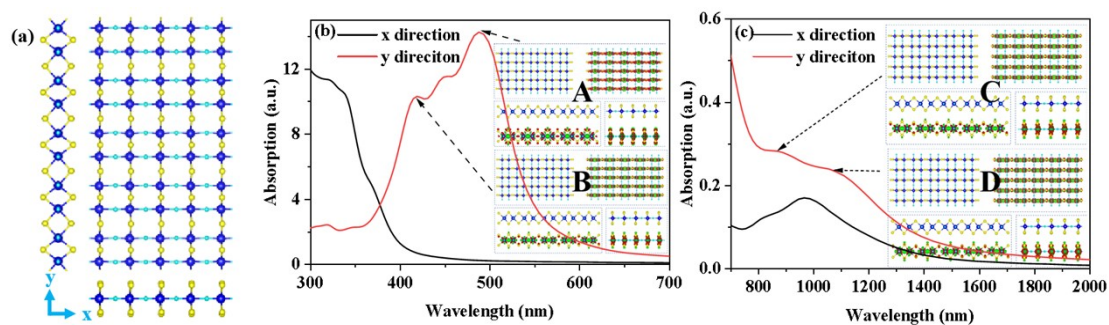

A

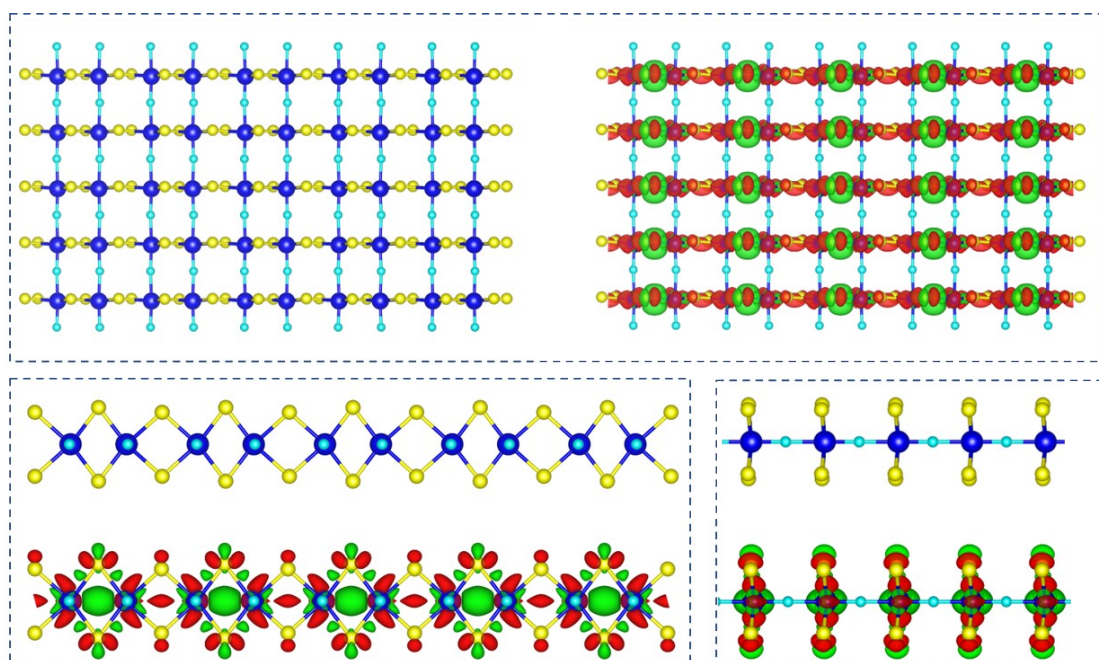

B

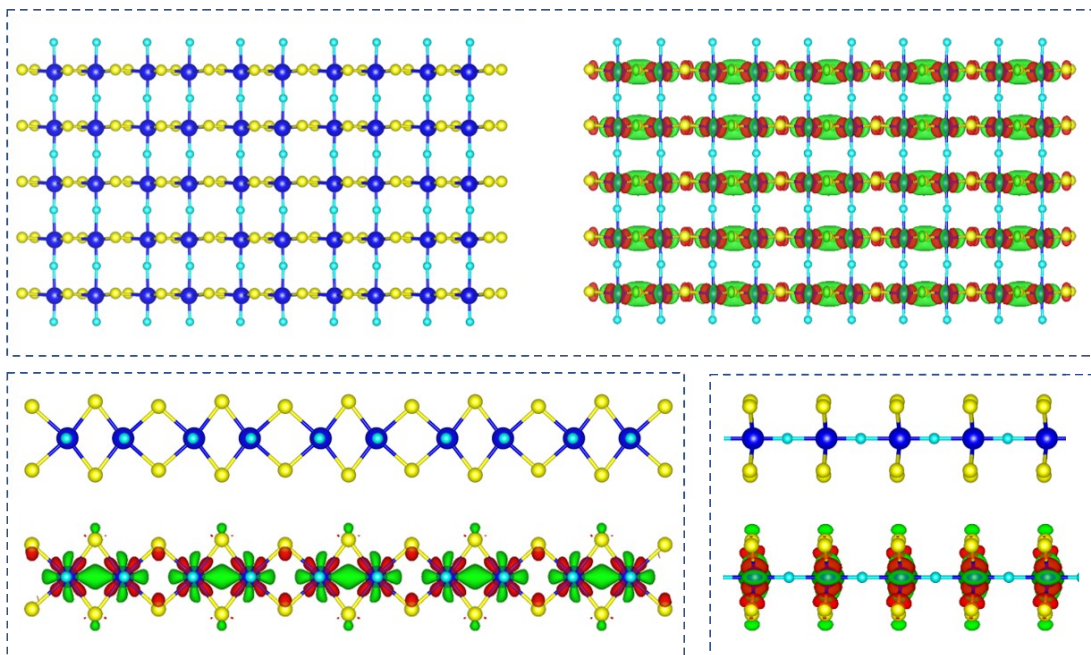

C

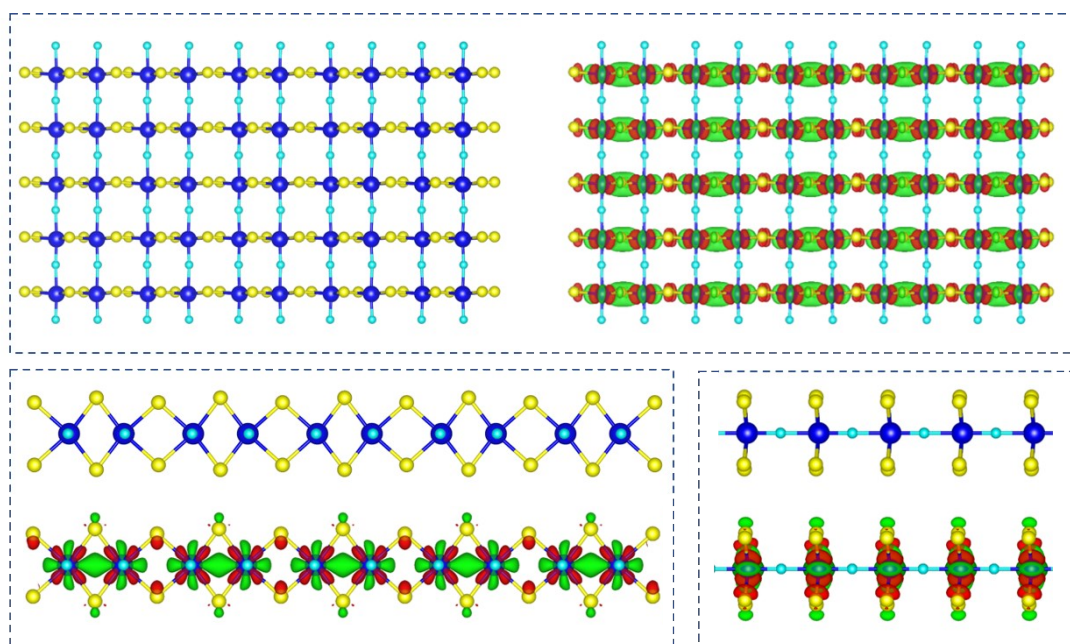

D

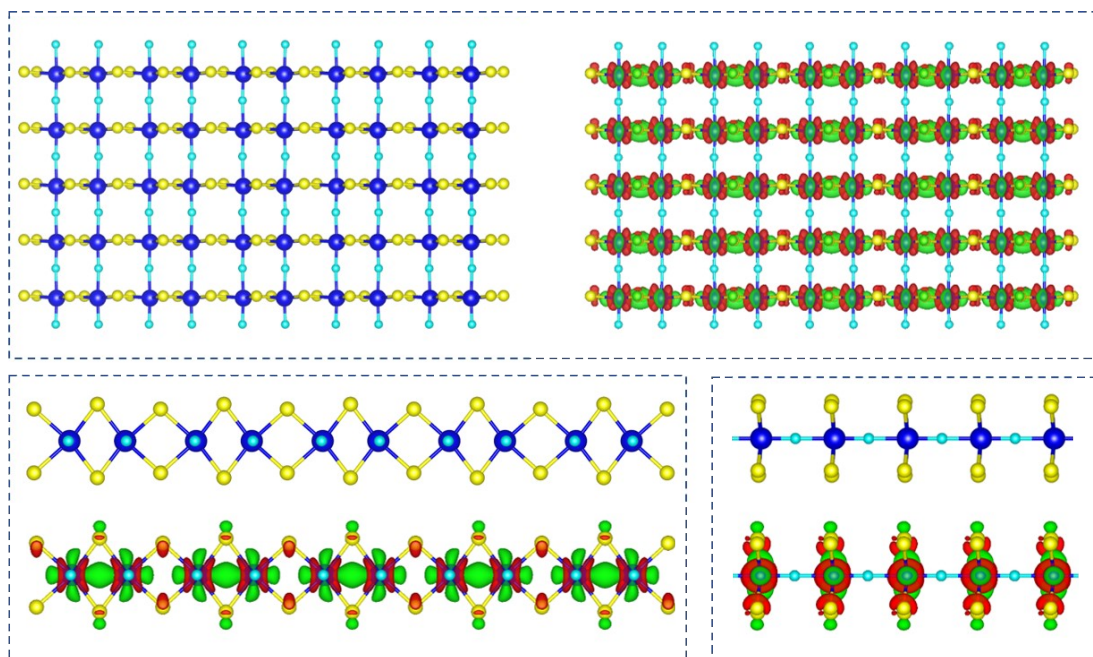

**Figure S1.** (a) Three views of the monolayer NbOCl<sub>2</sub>. The blue atom is the metal Nb, the yellow atom is Cl, and the cyan atom is O. (b)(c) Absorption spectrum in the ultraviolet-visible region and the infrared region of the monolayer NbOCl<sub>2</sub>, and the embedded graphs A, B, C and D (the charge transfer of absorption peaks in direction y are also shown respectively).

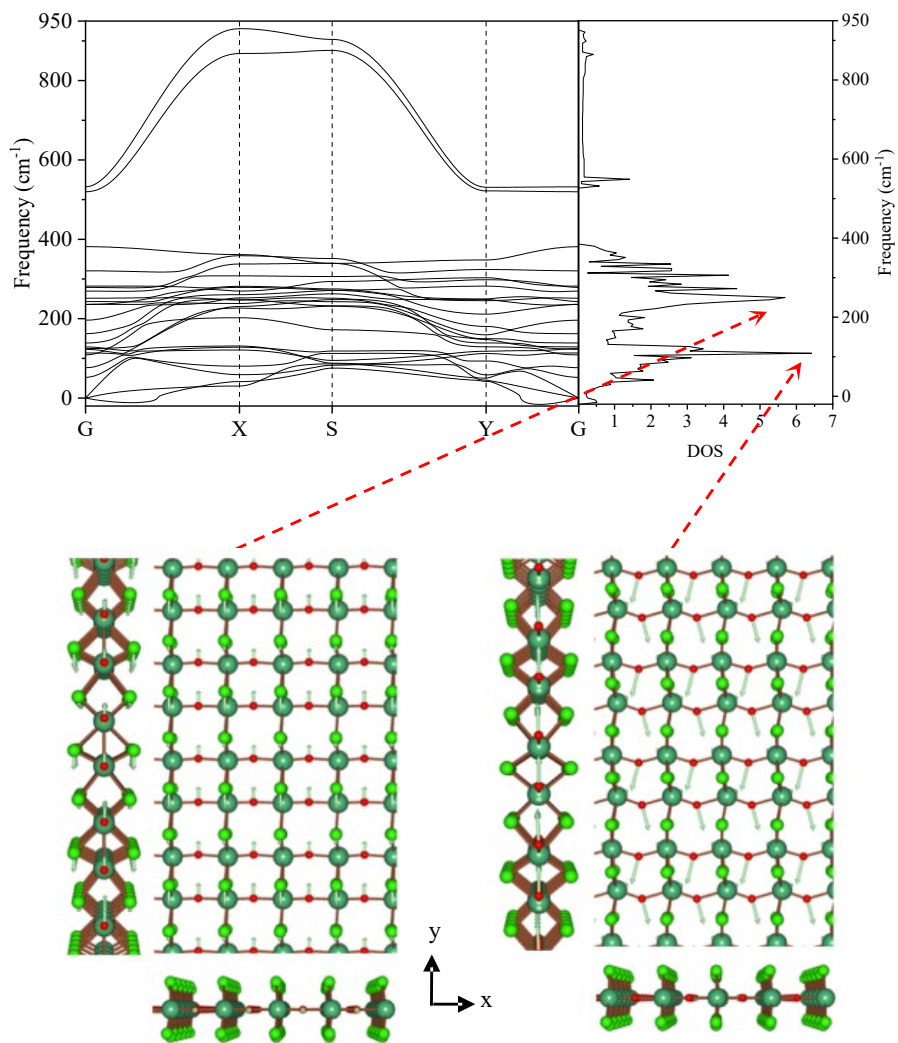

**Figure S2.** Vibration modes corresponding to the peaks of phonon DOS of monolayer NbOCl<sub>2</sub>. the dark green atom is the metal Nb, the light green atom is Cl, and the red atom is O.

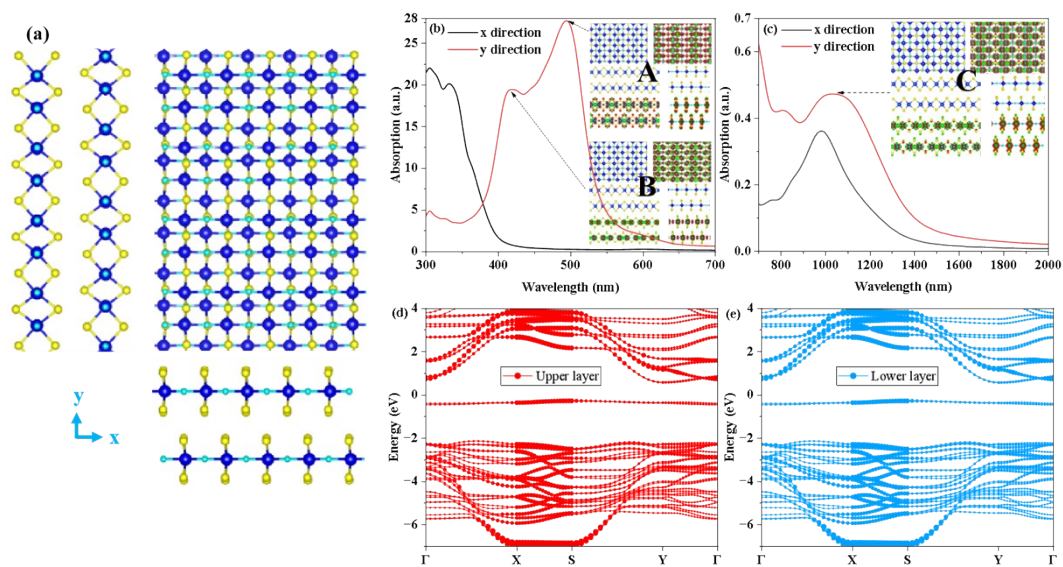

A

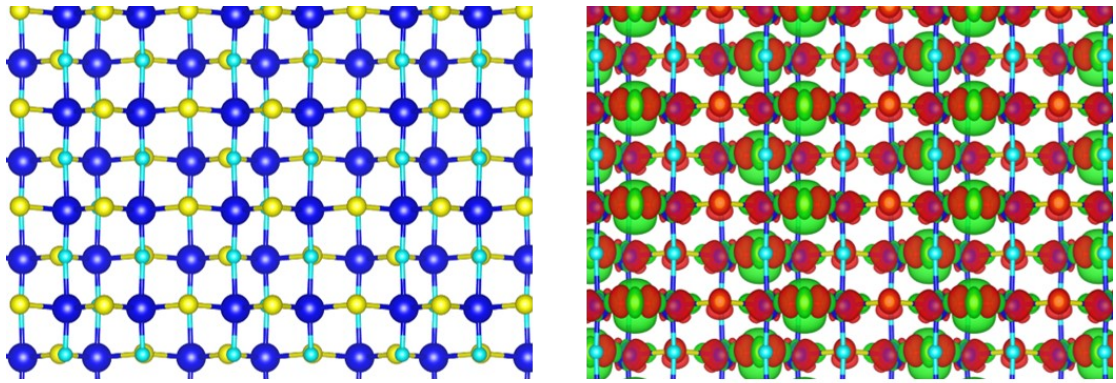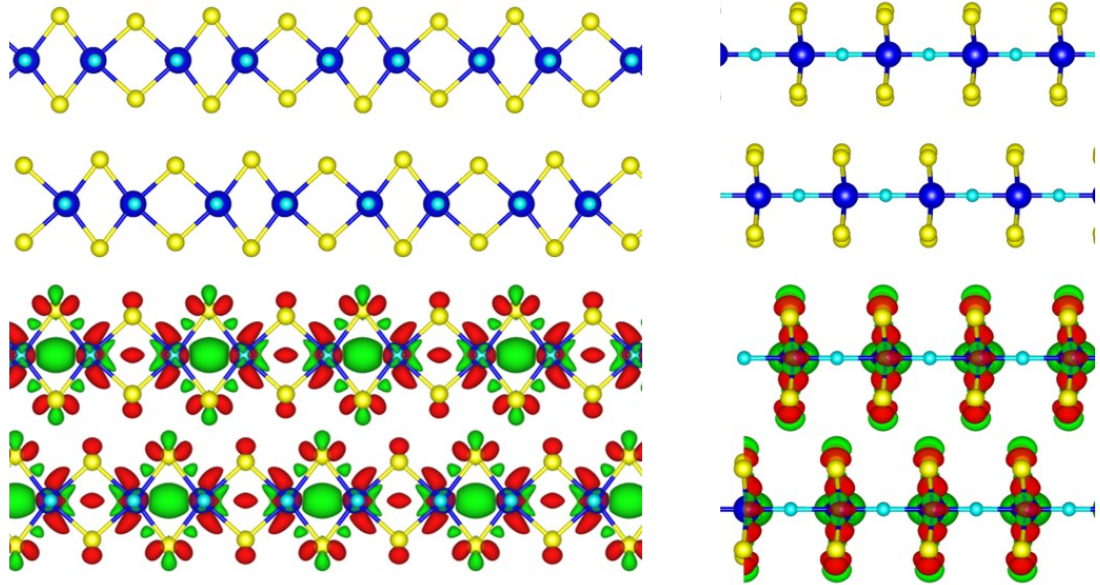

B

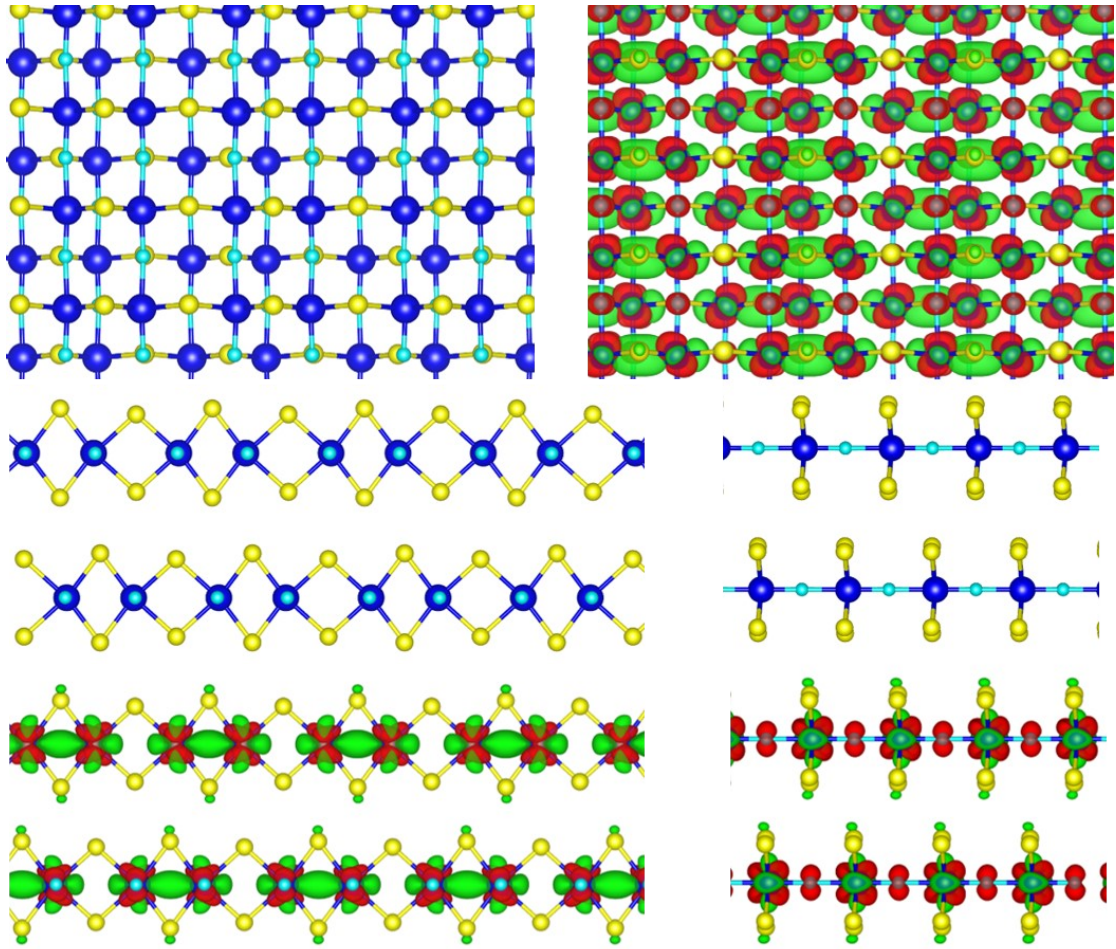

C

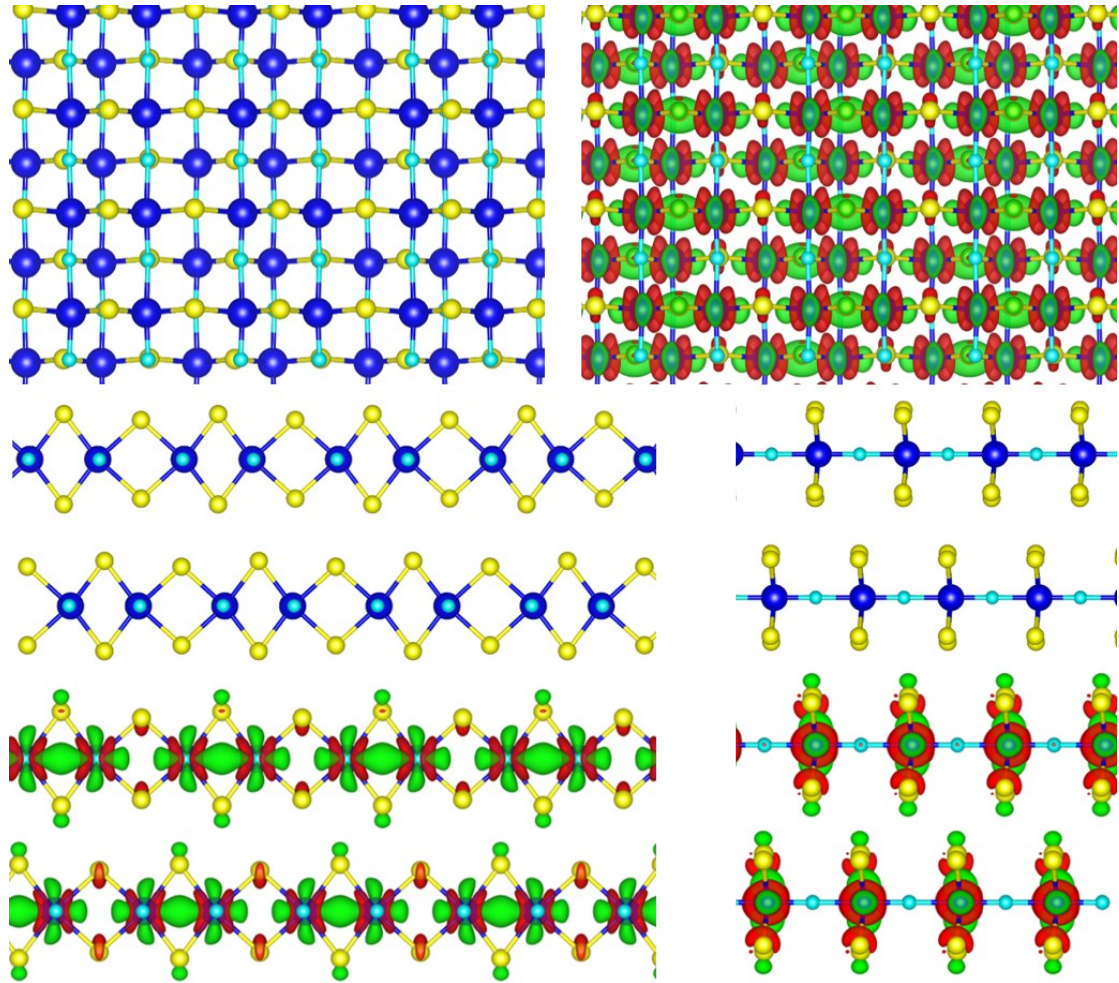

**Figure S3.** (a) Three views of the bilayer NbOCl<sub>2</sub>. (b)(c) Absorption spectrum in the ultraviolet-visible region and the infrared region of the bilayer NbOCl<sub>2</sub>, and the embedded graphs A, B, and C (the charge transfer of absorption peaks in direction y are also shown respectively). (d)(e) Energy band of the upper NbOCl<sub>2</sub> and the lower NbOCl<sub>2</sub>.

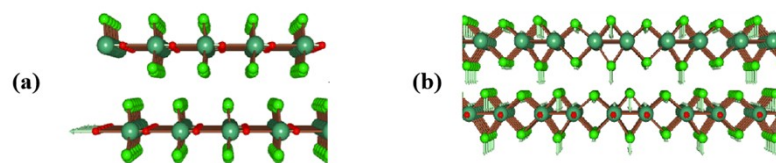

**Figure S4.** Vibration modes of the strongest peaks in (a) IR and (b) Raman spectrum of the bilayer NbOCl<sub>2</sub>.

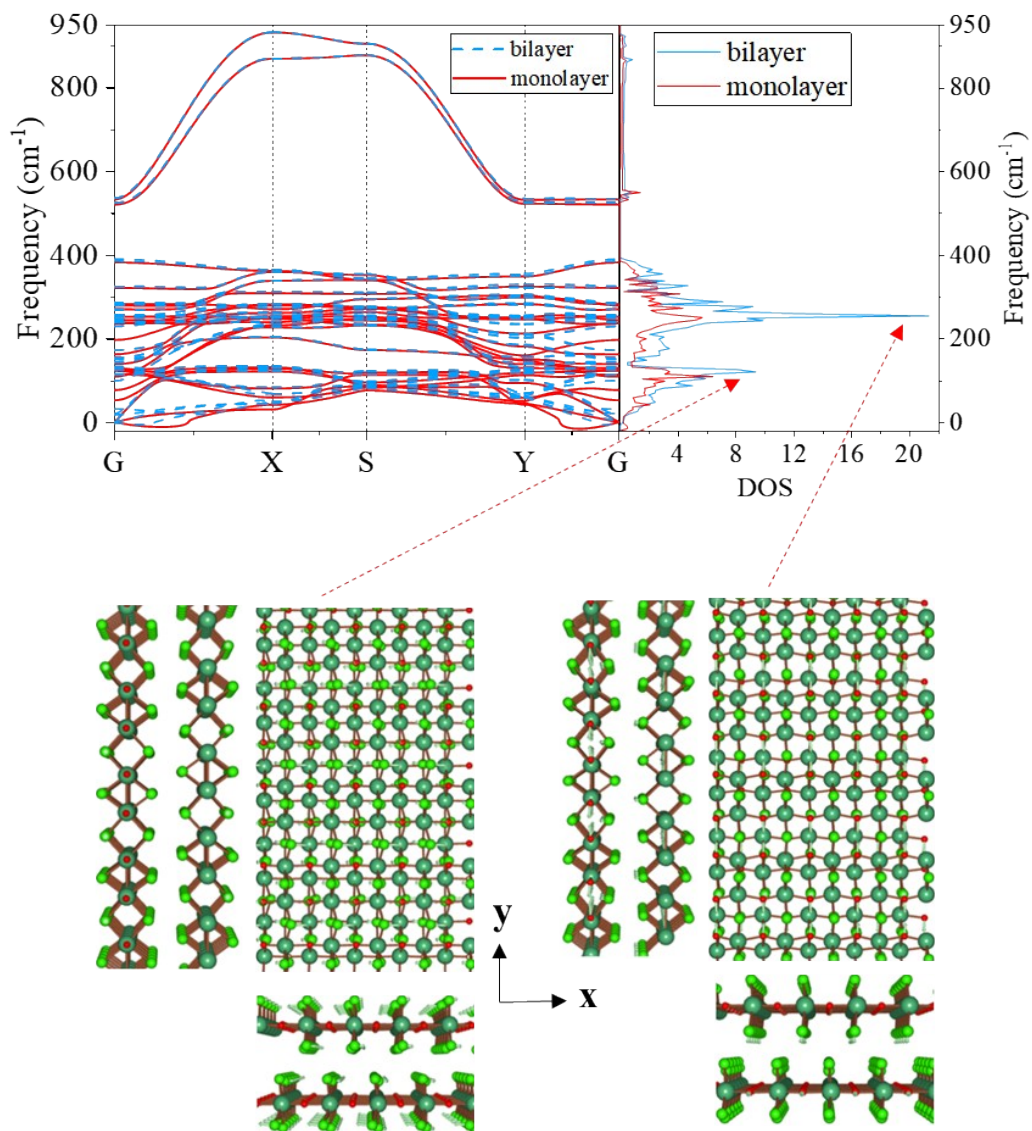

**Figure S5.** Vibration modes corresponding to the peaks of phonon DOS of bilayer NbOCl<sub>2</sub>.
